# Supplementary material for: Areca palm velarivirus 1 encoded P25 hijacks host eIF4E to bind to a novel 3′ cap- independent translation enhancer (3′-CITE) for viral translation
Source: Research Square preprint supplement (doi:10.21203/rs.3.rs-7503495/v1), 2025-09-23

**Supplemental figures**

Figure 1A


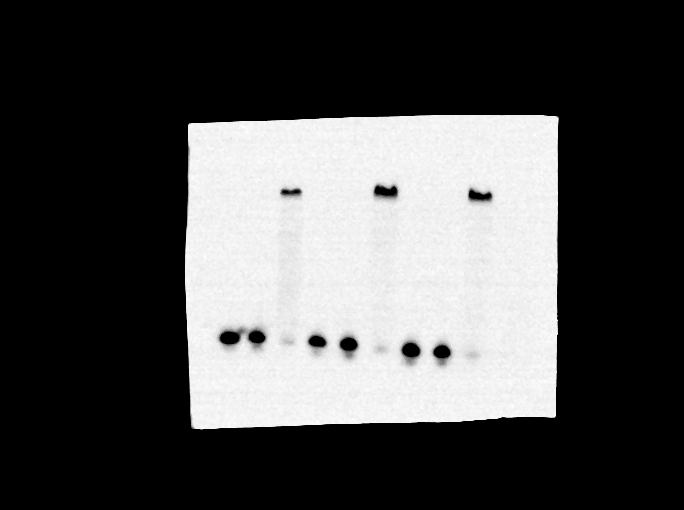


Figure 1 B


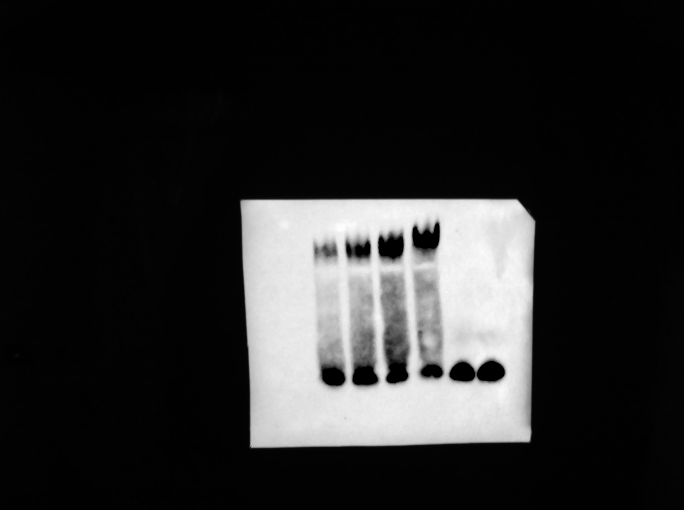


Figure 2D-1


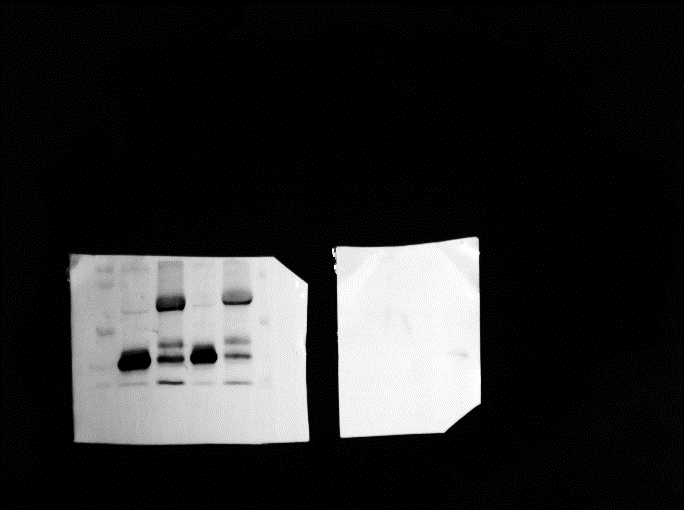


Figure 2D-2


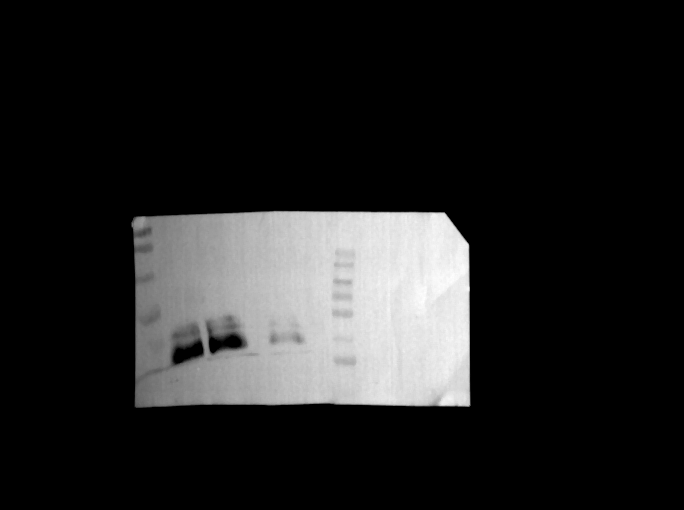


Figure 2E-1


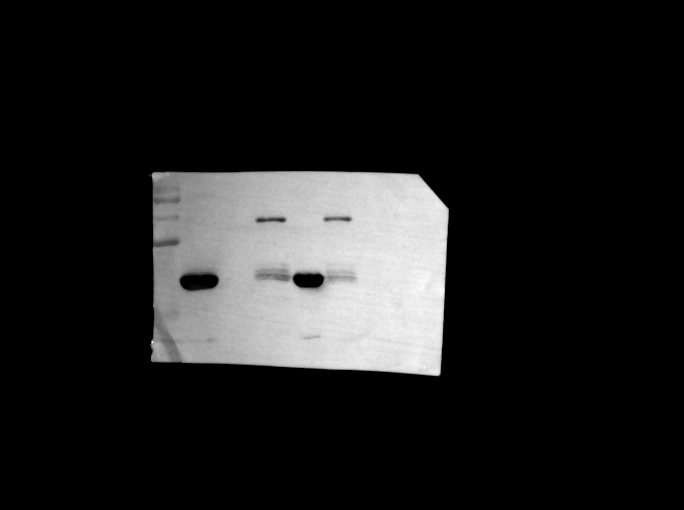


Figure 2E-2


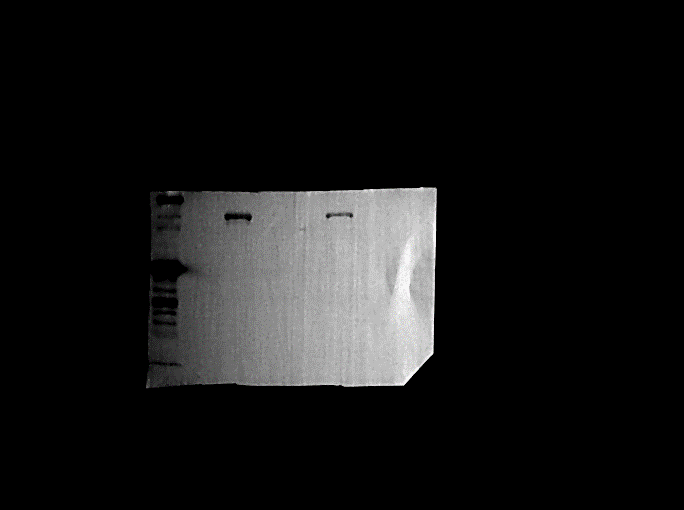


Figure 3A-1


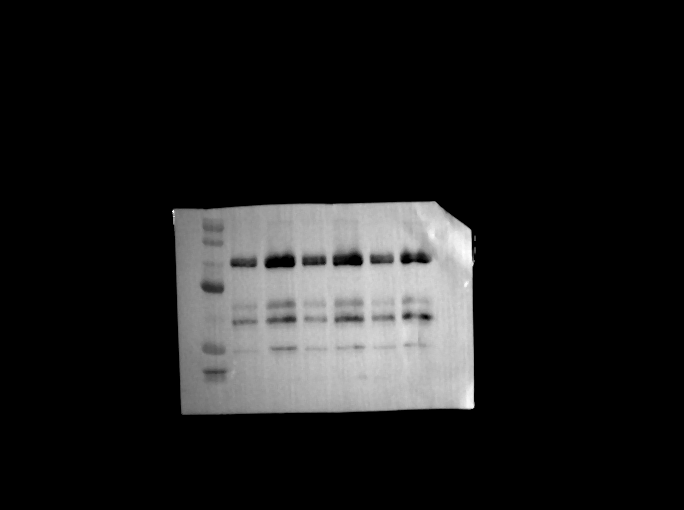


Figure 3A-2


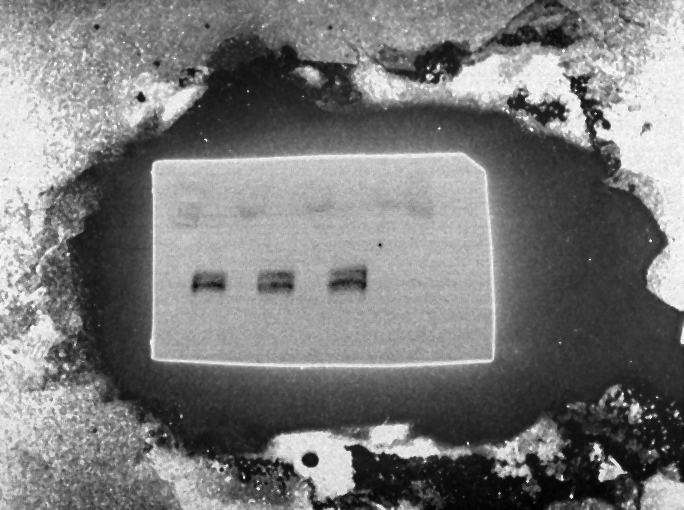


Figure 3A-3


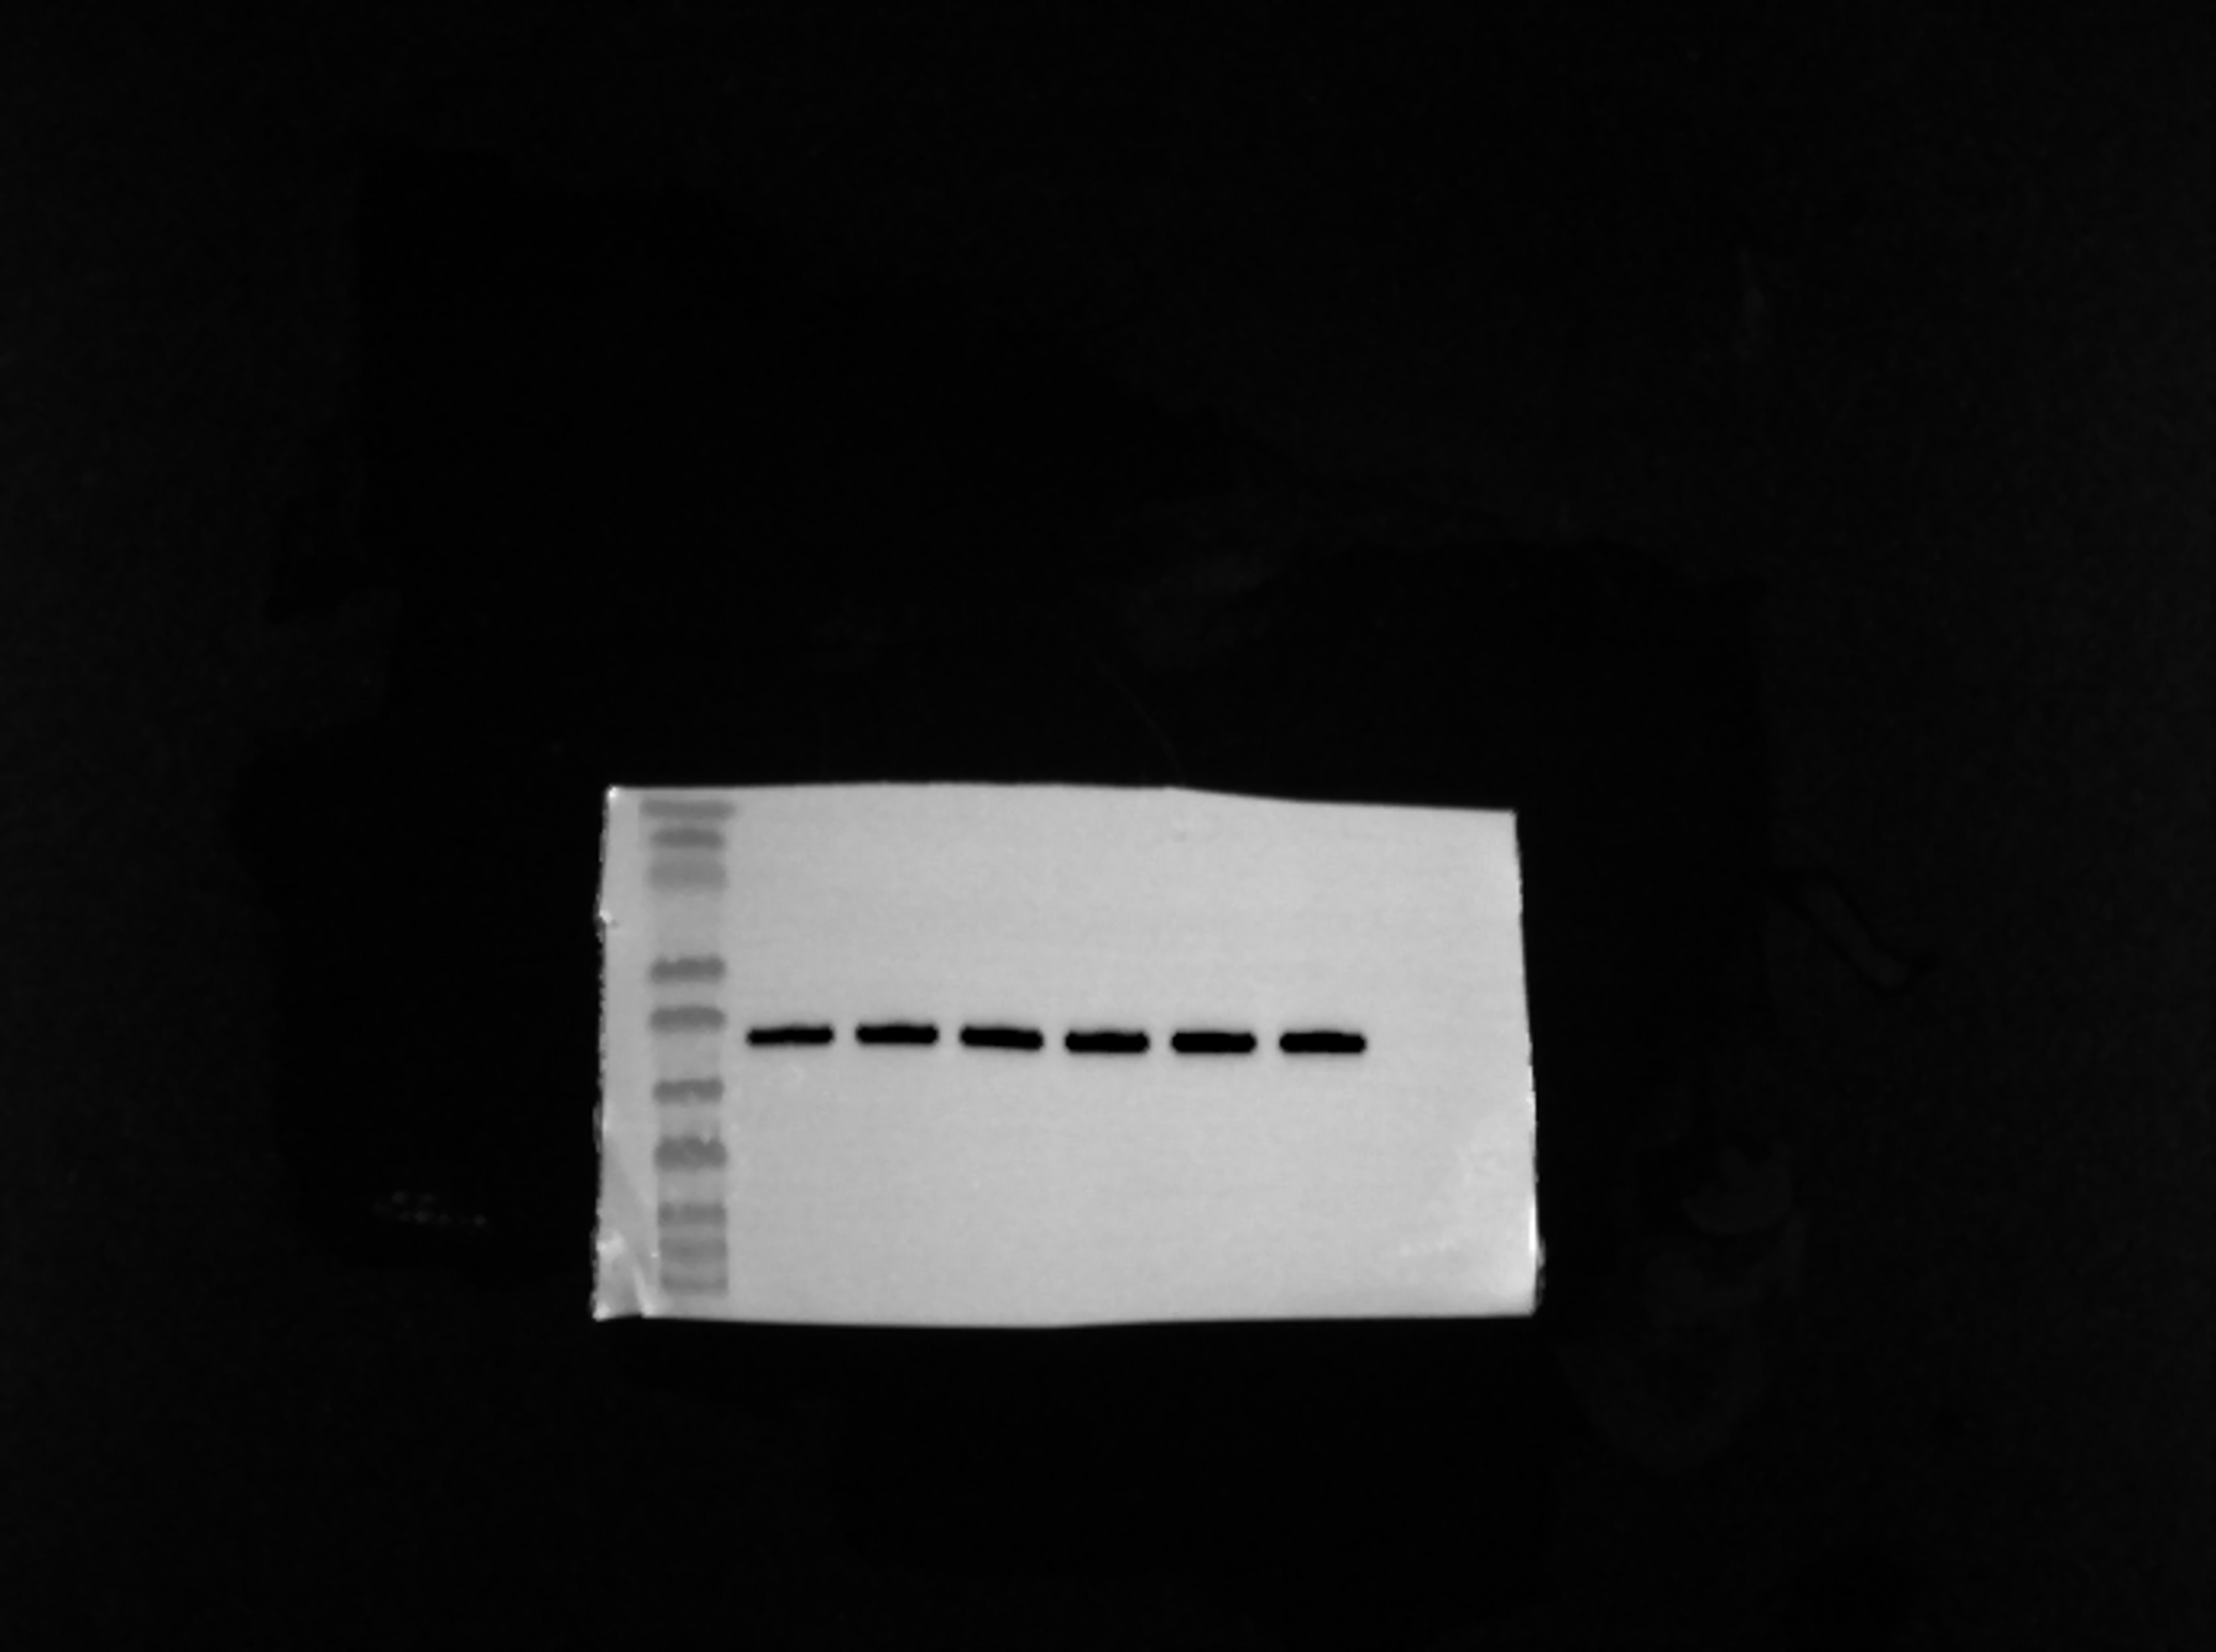


Figure 3B-1


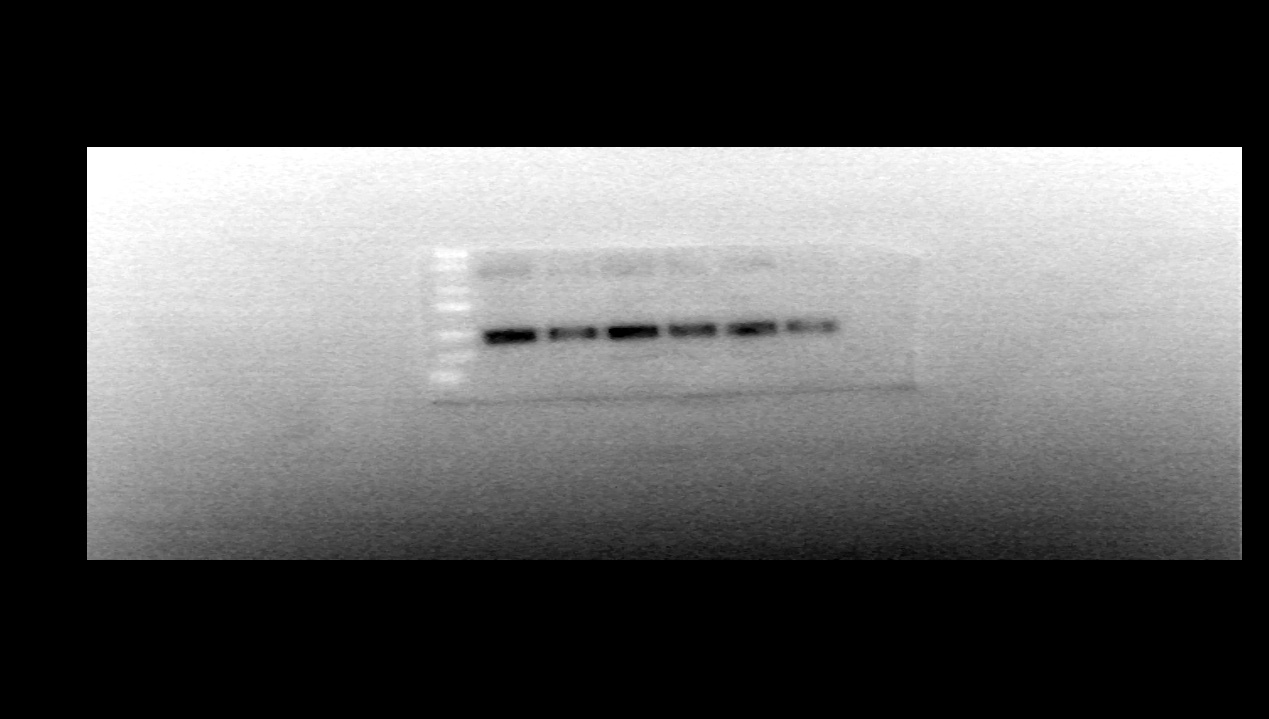


Figure 3B-2


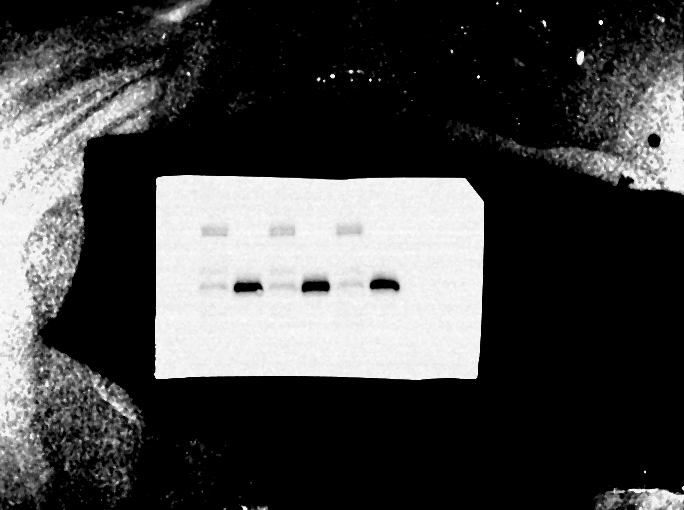


Figure 3B-3


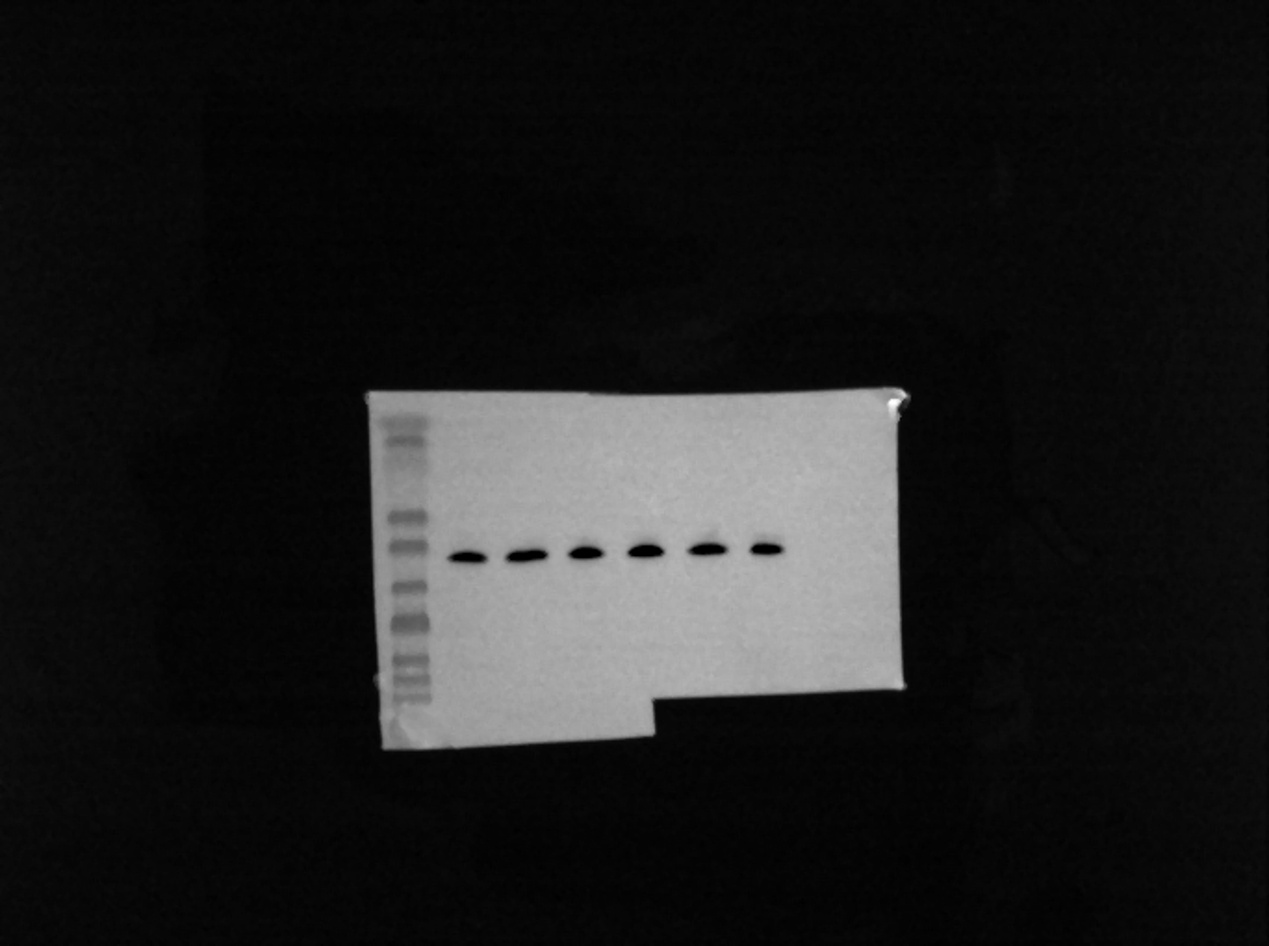


Figure 6A


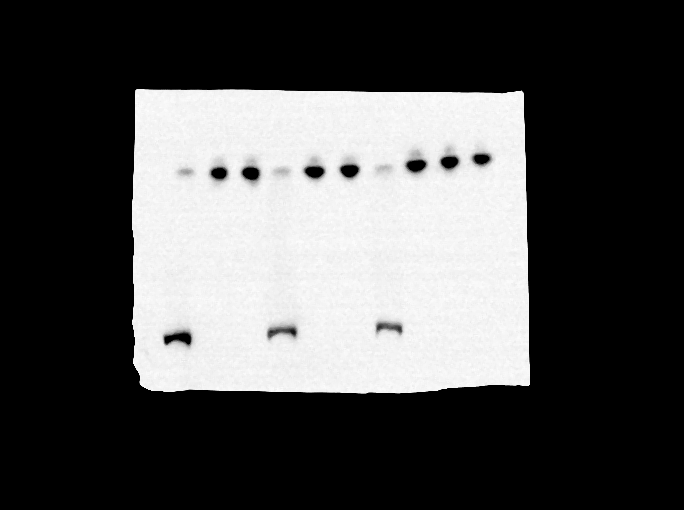


Figure 6B


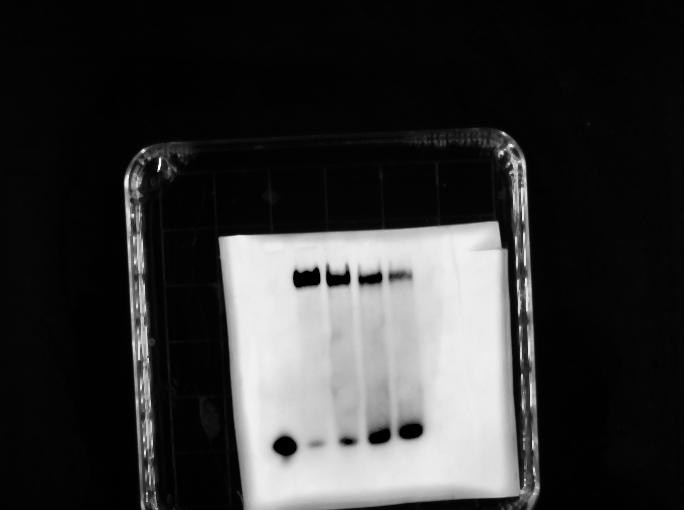


Figure 6C


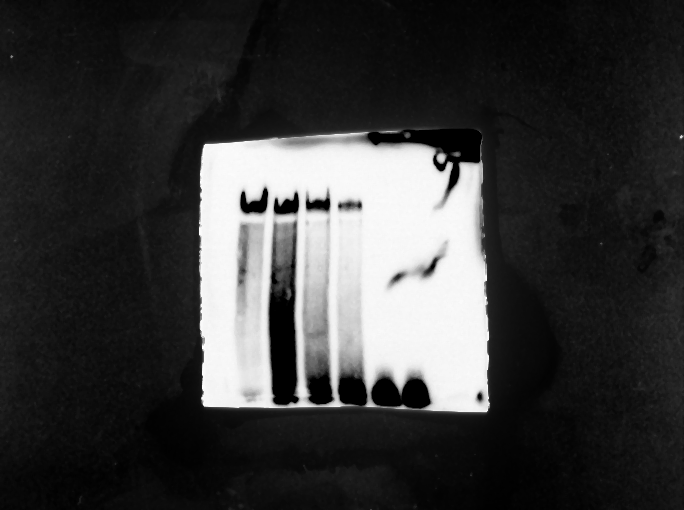


**Figure 7B-1**

**
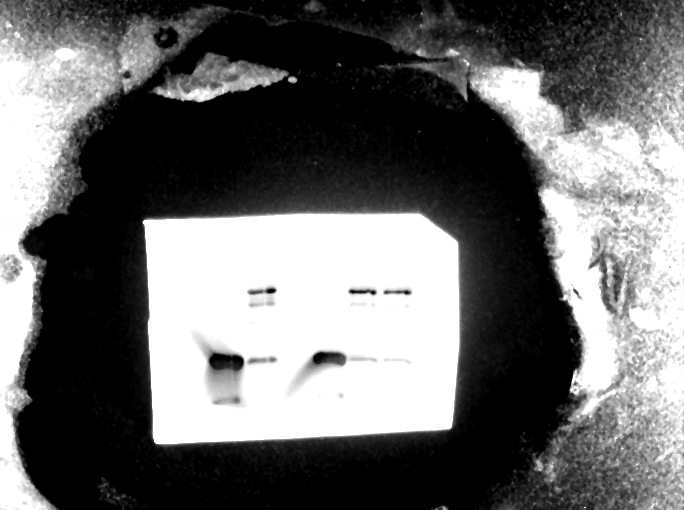
**

**Figure 7B-2**

**
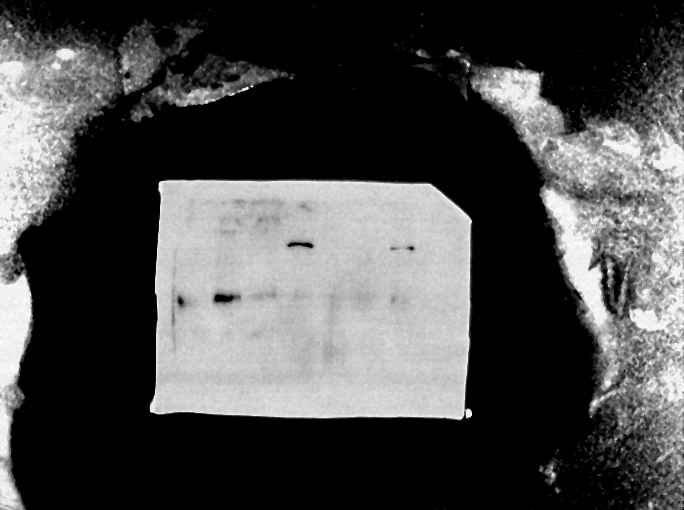
**

**Figure 7B-3**


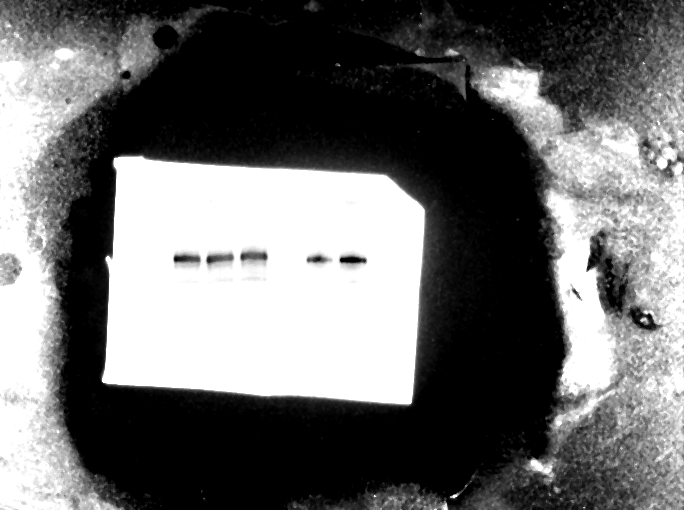


Figure 7C-1
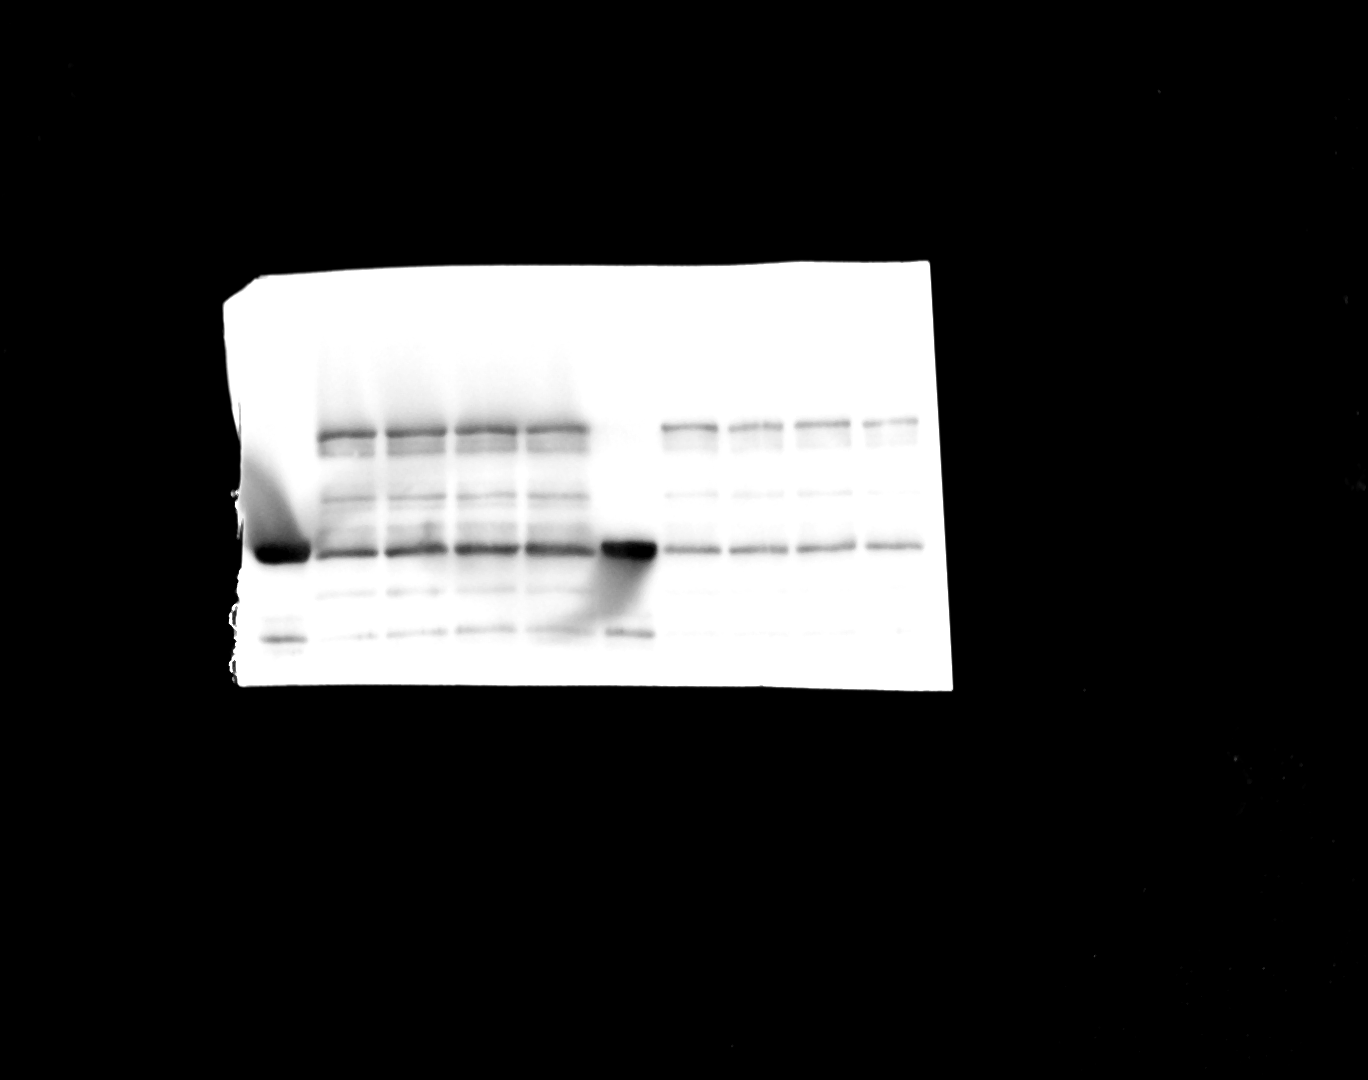


Figure 7C-2


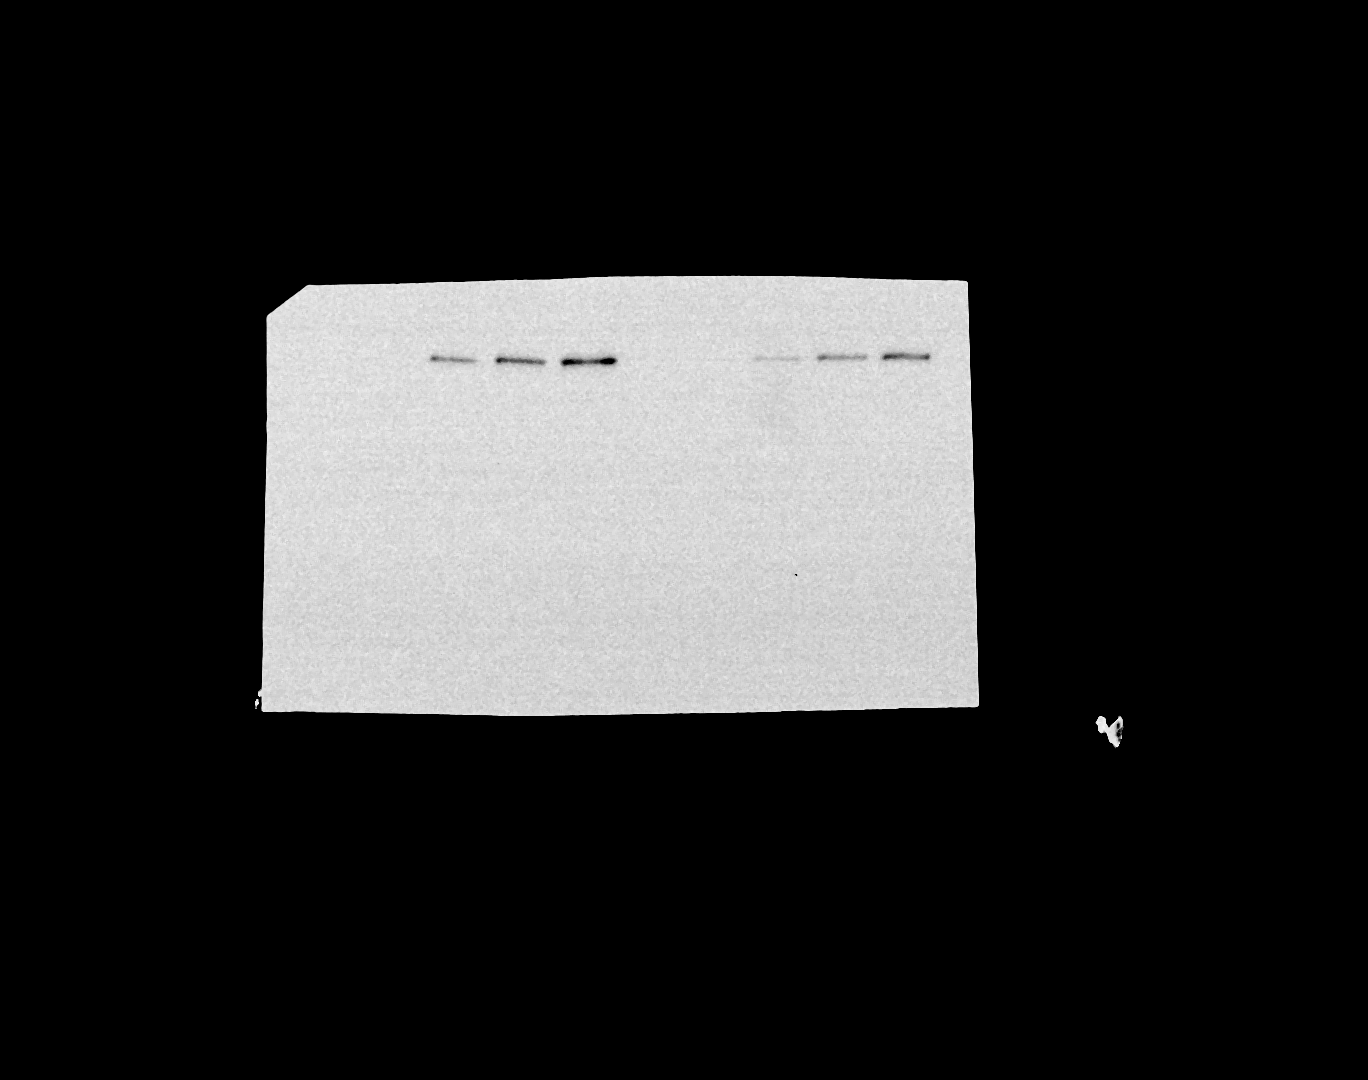


Figure 7C-3


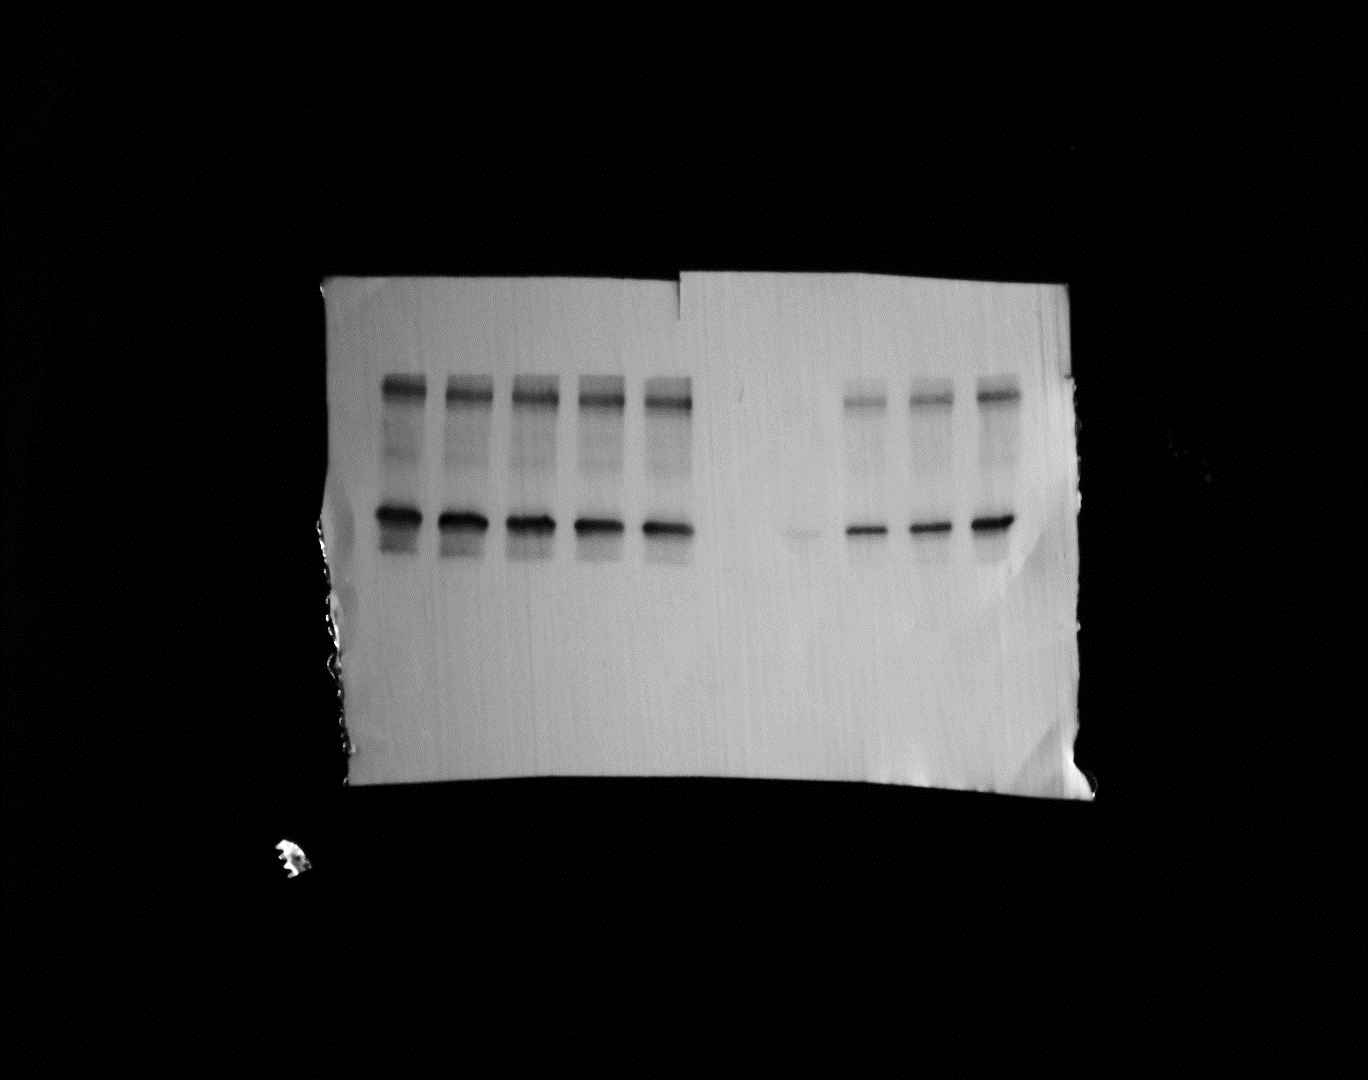

Supplement: Supplementary file 2 [file ad7d2cb52cff69cfc812a1df.docx]
